# Supplementary material for: SARS-CoV-2 surveillance and detection in wild, captive, and domesticated animals in Nebraska: 2021–2023
Source: Frontiers journal article supplement (doi:10.3389/fvets.2024.1496207), 2025-01-03
Supplement: Data_Sheet_1.pdf [file Data_Sheet_1.pdf]

## SUPPLEMENTAL TABLE

### **Data Availability**

GISAID Identifier: EPI\_SET\_241110hq

doi: [10.55876/gis8.241110hq](https://doi.org/10.55876/gis8.241110hq)

All genome sequences and associated metadata in this dataset are published in GISAID's EpiCoV database. To view the contributors of each individual sequence with details such as accession number, Virus name, Collection date, Originating Lab and Submitting Lab and the list of Authors, visit [10.55876/gis8.241110hq](https://gisaid.org/241110hq)

### **Data Snapshot**

- EPI\_SET\_241110hq is composed of 215 individual genome sequences.
- The collection dates range from 2021-03-30 to 2021-12-21;
- Data were collected in 11 countries and territories;
- All sequences in this dataset are compared relative to hCoV-19/Wuhan/WIV04/2019 (WIV04), the official reference sequence employed by GISAID (EPI\_ISL\_402124). Learn more at <https://gisaid.org/WIV04>.
